# Supplementary material for: TAGLN2 promotes the proliferation, migration, invasion and EMT of renal clear cell carcinoma through PI3K/Akt signaling pathway
Source: Research Square preprint supplement (doi:10.21203/rs.3.rs-2222490/v1), 2022-11-08
Supplement: Supplementary file 1 [file 6fb2dd2cfb80cac011e32d47.docx]

| Characteristic | Low expression of TAGLN2 | High expression of TAGLN2 | p |
| --- | --- | --- | --- |
| n | 269 | 270 |  |
| ­­Age, n (%) |  |  | 0.182 |
| <=60 | 126 (23.4%) | 143 (26.5%) |  |
| >60 | 143 (26.5%) | 127 (23.6%) |  |
| Gender, n (%) |  |  | 0.080 |
| Female | 103 (19.1%) | 83 (15.4%) |  |
| Male | 166 (30.8%) | 187 (34.7%) |  |
| T stage, n (%) |  |  | **0.001** |
| T1 | 160 (29.7%) | 118 (21.9%) |  |
| T2 | 32 (5.9%) | 39 (7.2%) |  |
| T3 | 75 (13.9%) | 104 (19.3%) |  |
| T4 | 2 (0.4%) | 9 (1.7%) |  |
| N stage, n (%) |  |  | **0.013** |
| N0 | 115 (44.7%) | 126 (49%) |  |
| N1 | 2 (0.8%) | 14 (5.4%) |  |
| M stage, n (%) |  |  | **0.010** |
| M0 | 225 (44.5%) | 203 (40.1%) |  |
| M1 | 28 (5.5%) | 50 (9.9%) |  |
| Pathologic stage, n (%) |  |  | **< 0.001** |
| Stage I | 159 (29.7%) | 113 (21.1%) |  |
| Stage II | 28 (5.2%) | 31 (5.8%) |  |
| Stage III | 52 (9.7%) | 71 (13.2%) |  |
| Stage IV | 29 (5.4%) | 53 (9.9%) |  |
| Histologic grade, n (%) |  |  | **< 0.001** |
| G1 | 10 (1.9%) | 4 (0.8%) |  |
| G2 | 131 (24.7%) | 104 (19.6%) |  |
| G3 | 106 (20%) | 101 (19%) |  |
| G4 | 17 (3.2%) | 58 (10.9%) |  |
| OS event, n (%) |  |  | **< 0.001** |
| Alive | 208 (38.6%) | 158 (29.3%) |  |
| Dead | 61 (11.3%) | 112 (20.8%) |  |
| DSS event, n (%) |  |  | **< 0.001** |
| Alive | 234 (44.3%) | 186 (35.2%) |  |
| Dead | 29 (5.5%) | 79 (15%) |  |

Table.1 Clinicopathological parameters of TAGLN2 expression group in ccRCC patients from TCGA-KIRC data
